# Supplementary material
Source: PubMed Central journal article supplement (PMC10659116)

# L2/3\_IT Excitatory

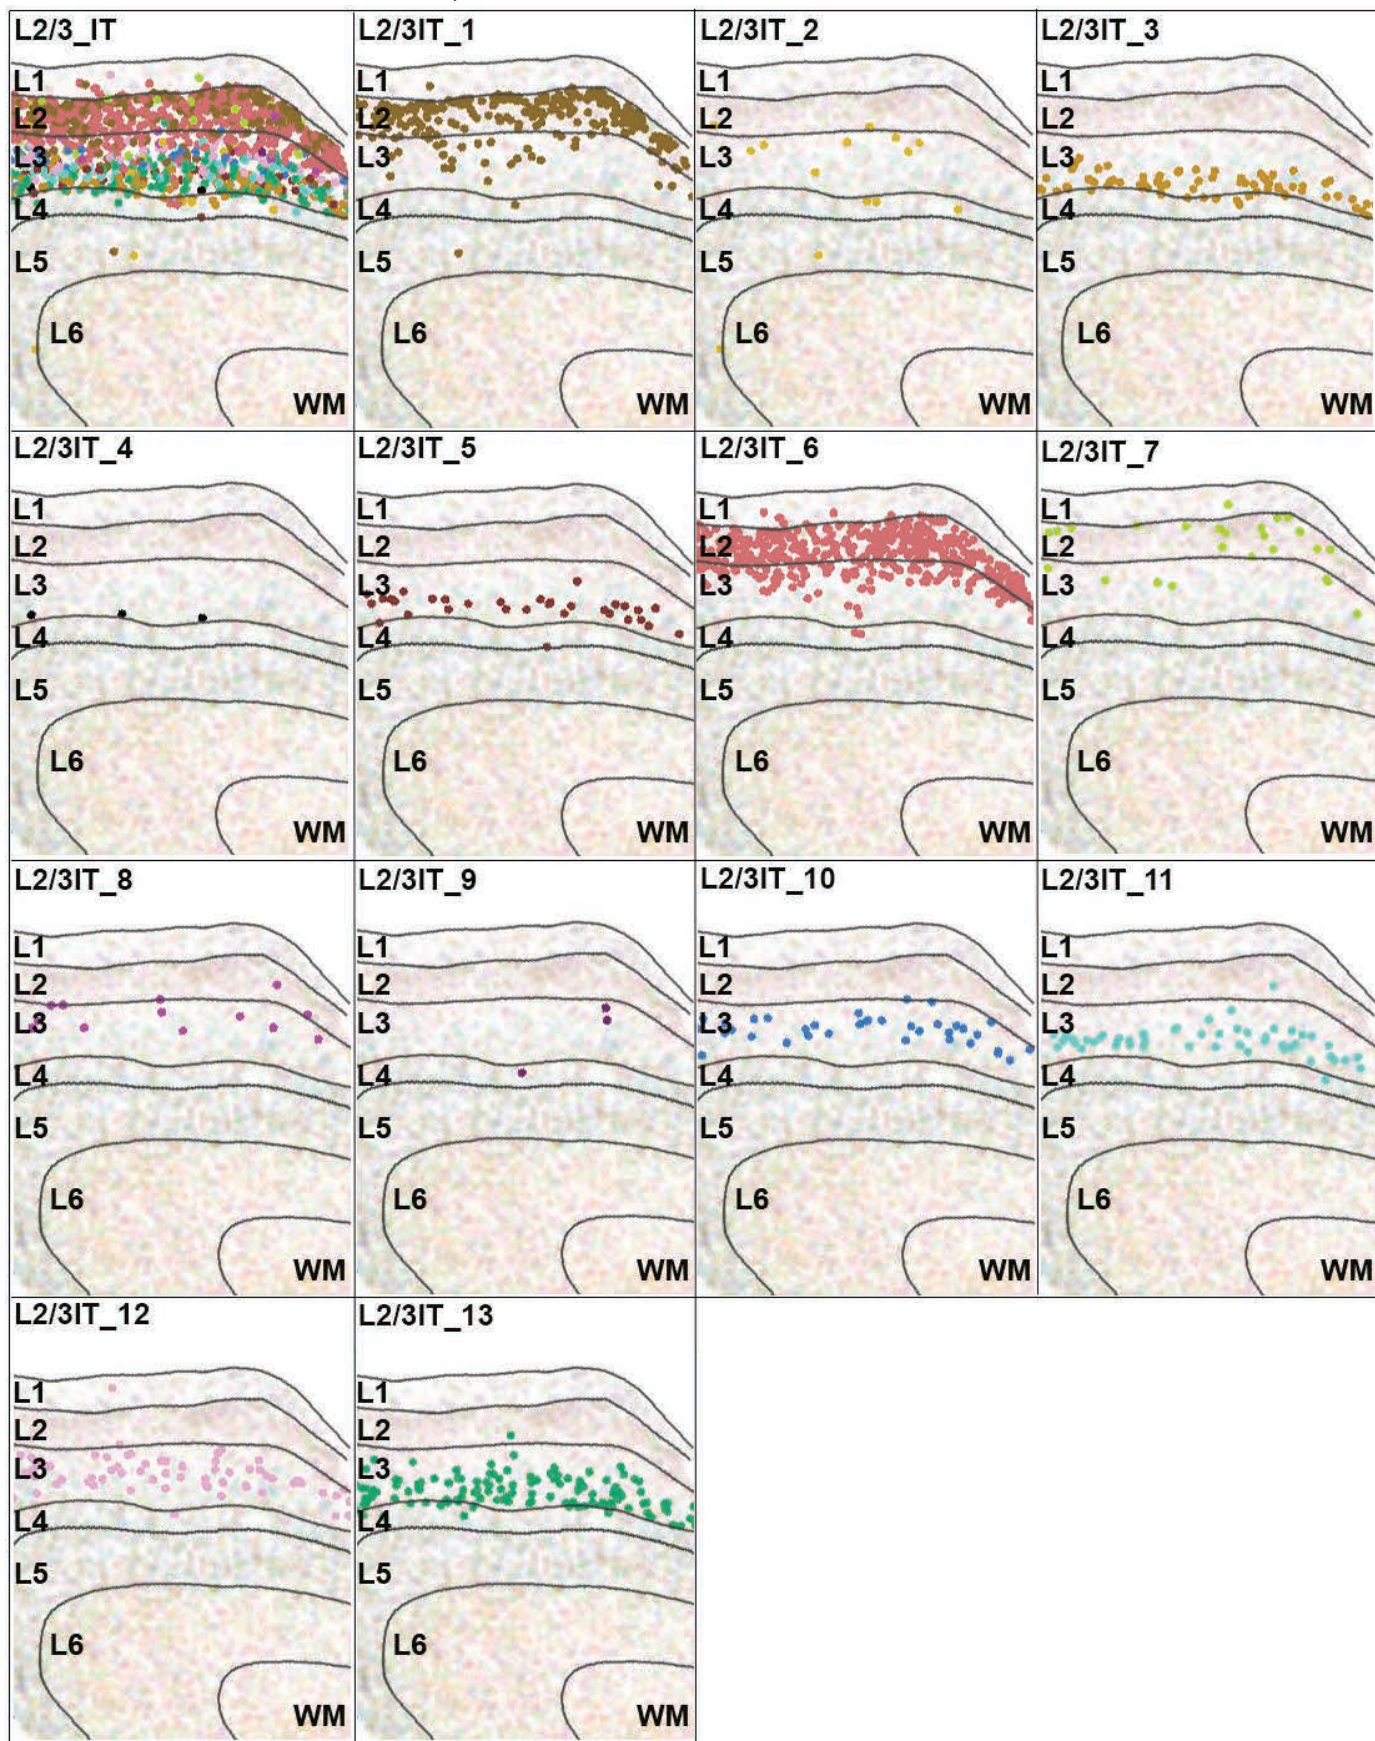

# L4\_IT Excitatory

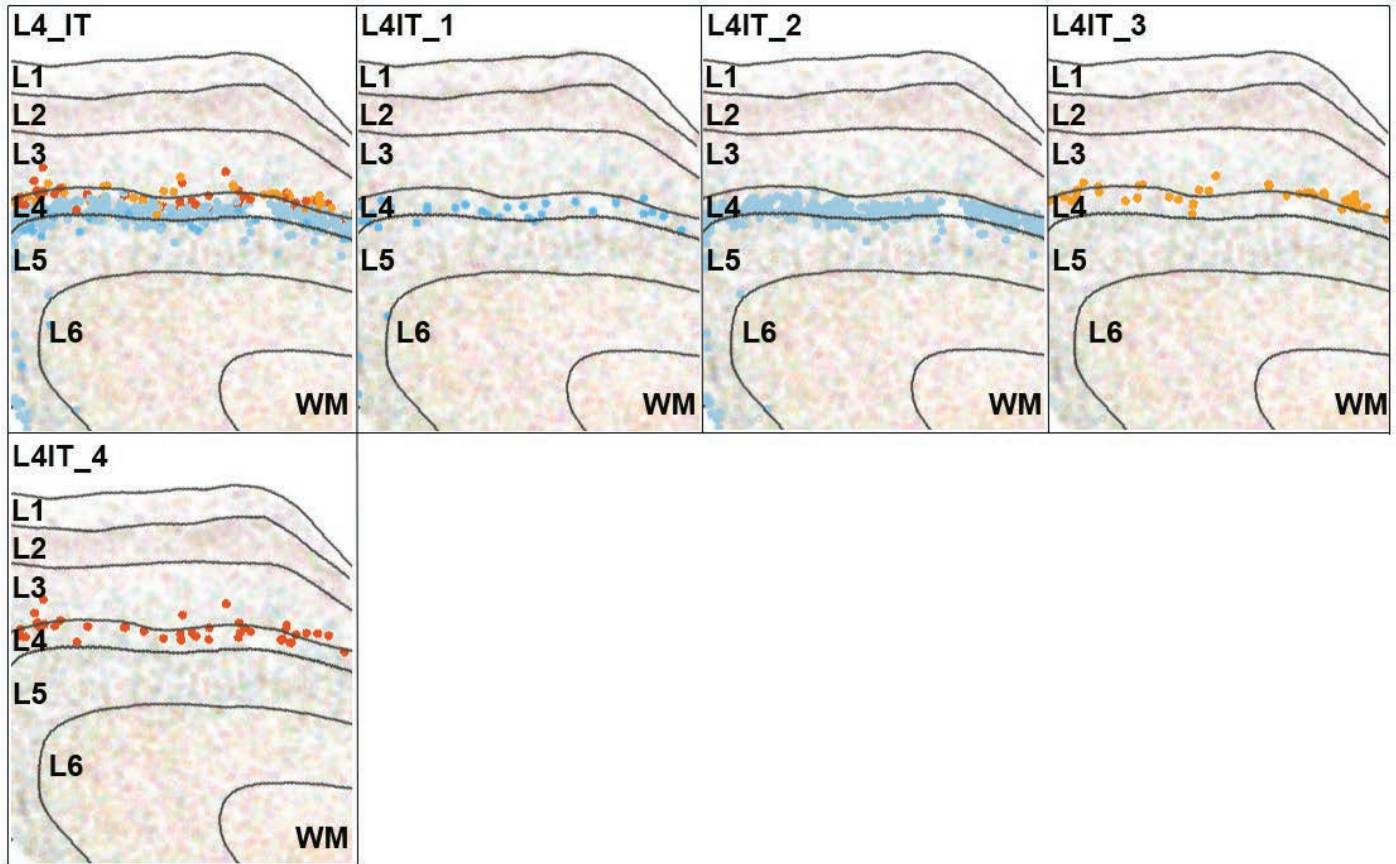

# L5\_IT Excitatory

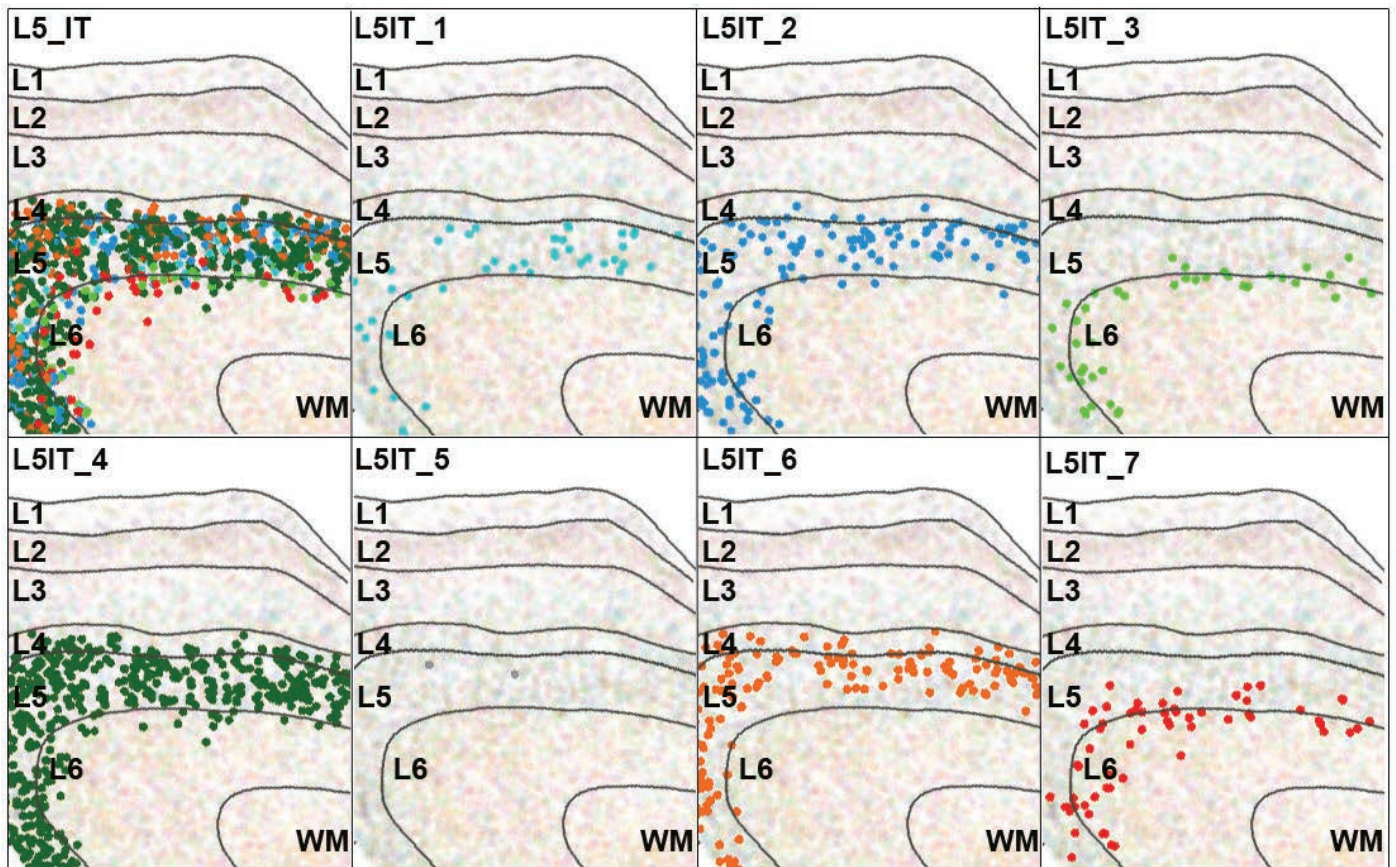

## L6\_IT Excitatory

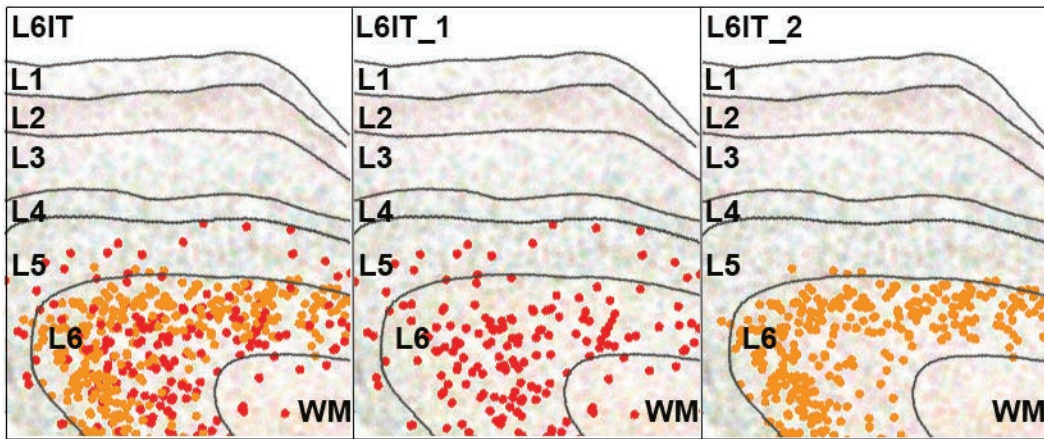

## L5/6\_IT Car3 Excitatory

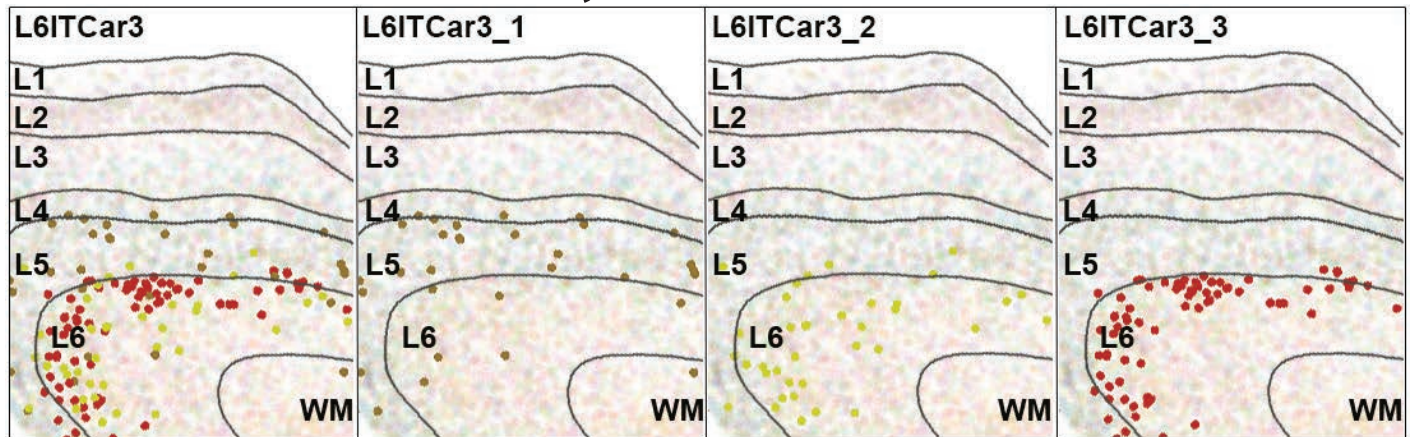

# L5/6\_NP Excitatory

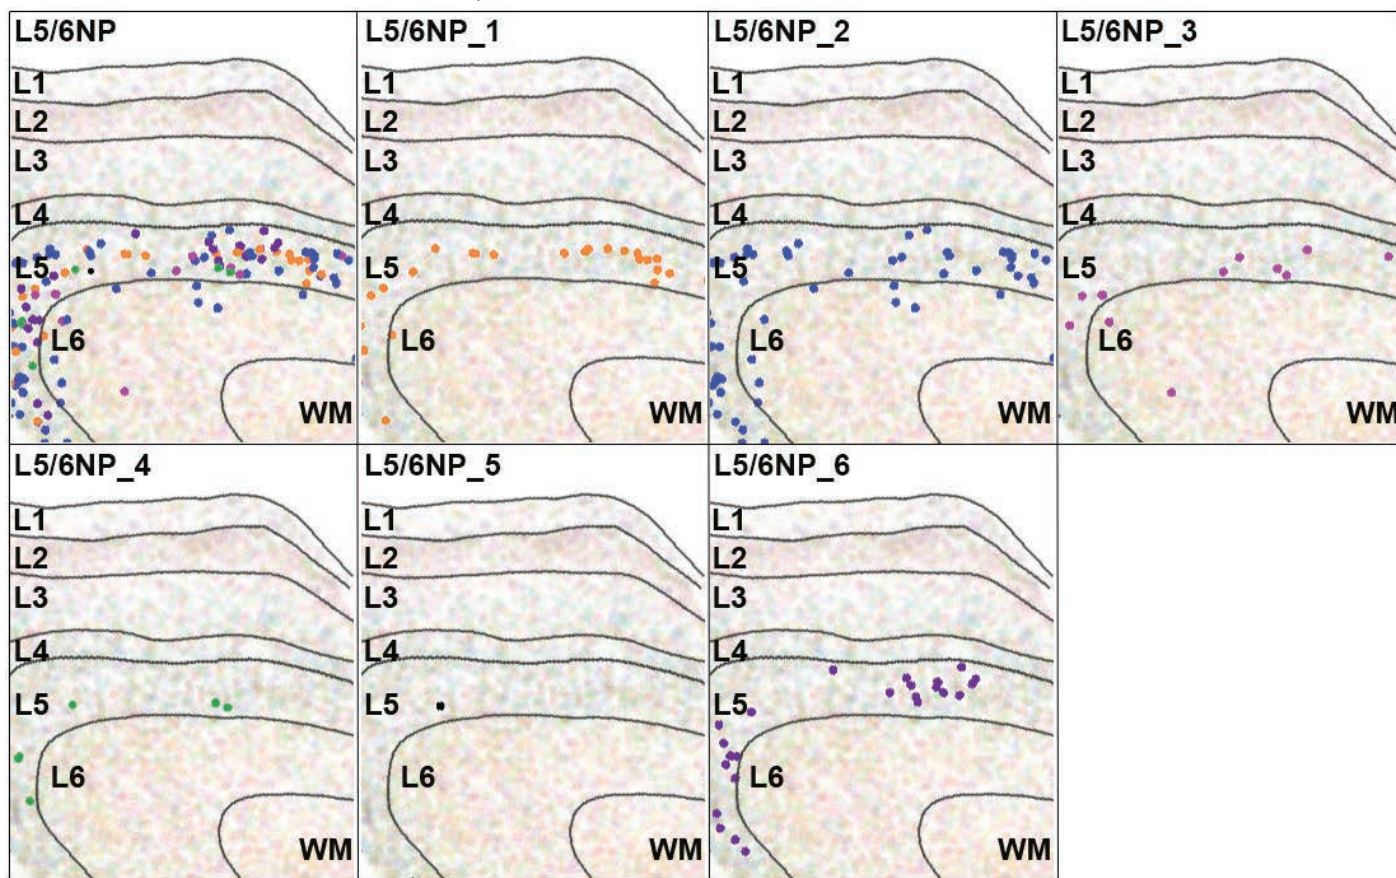

# L5\_ET Excitatory

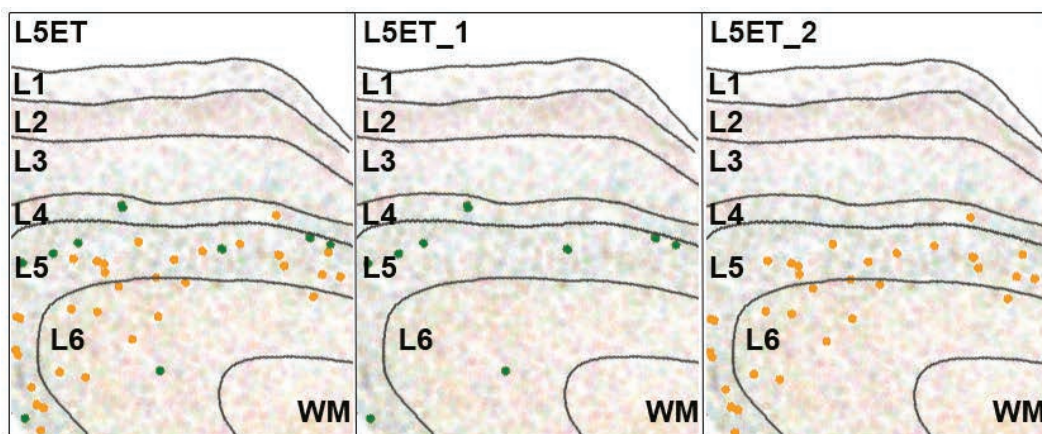

# L6\_CT Excitatory

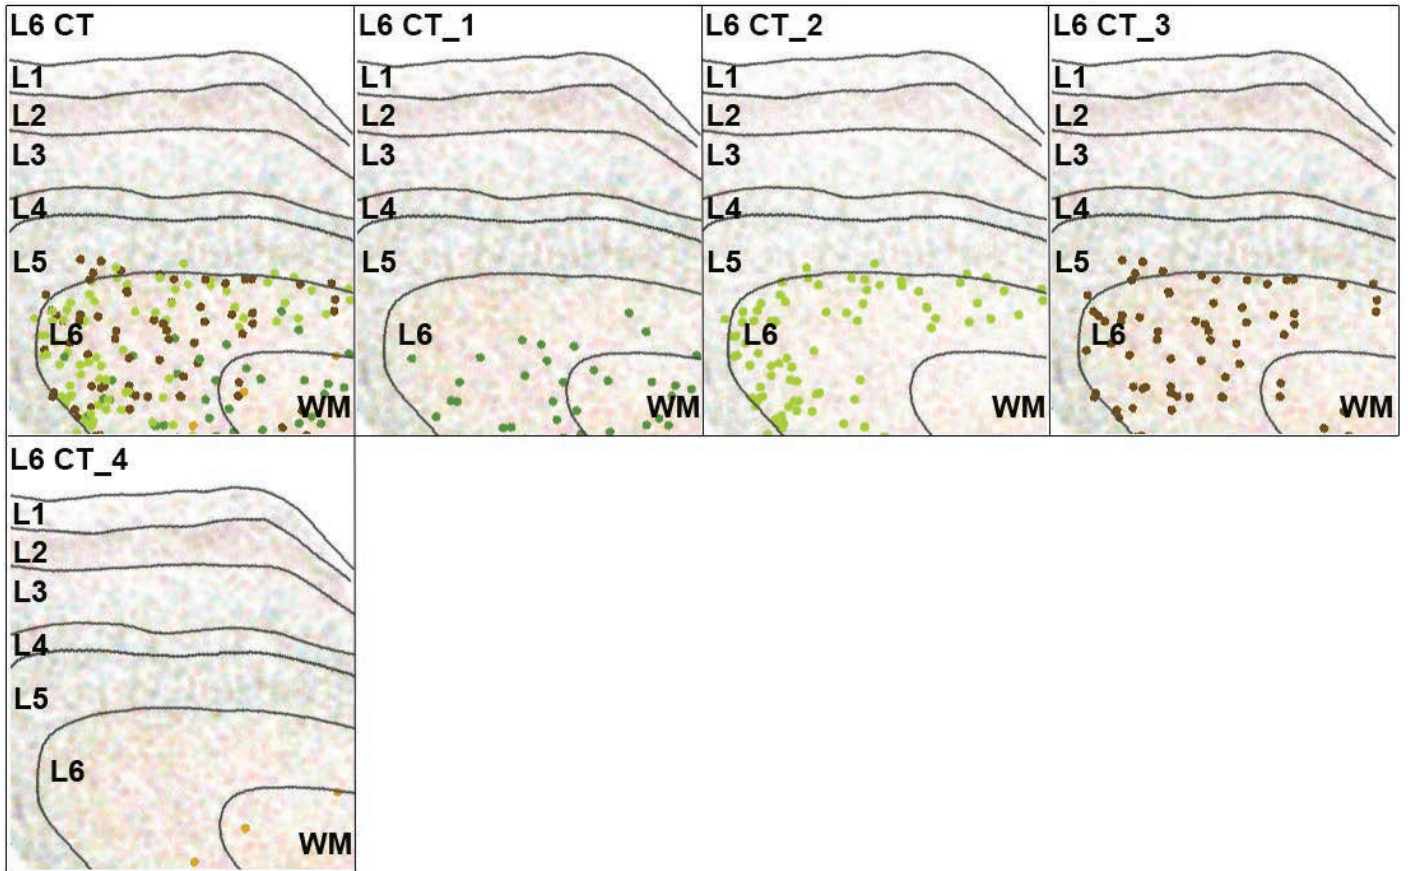

# L6b Excitatory

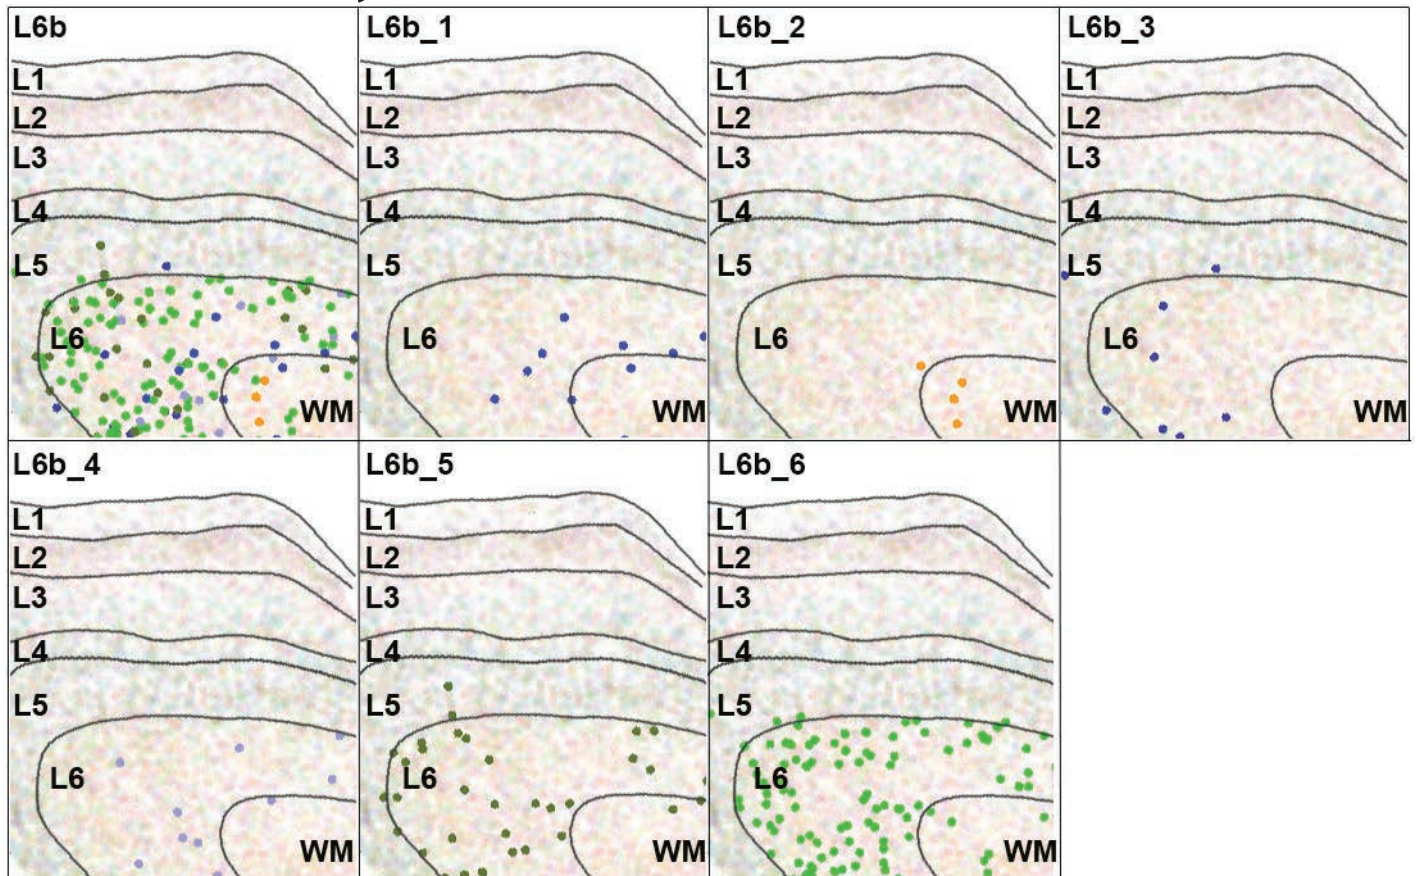

# LAMP5 Interneurons

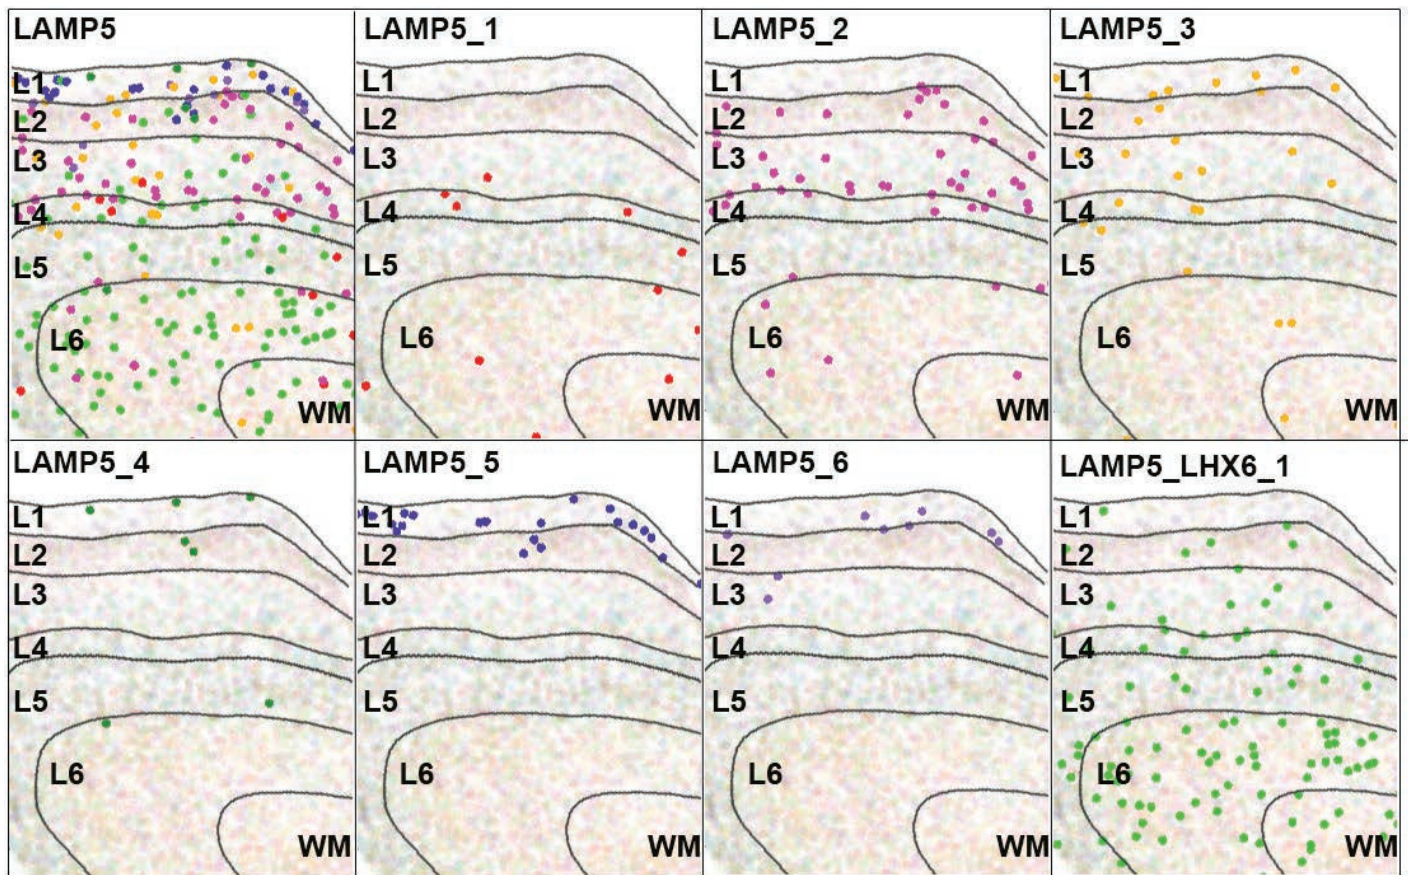

# PAX6 Interneurons

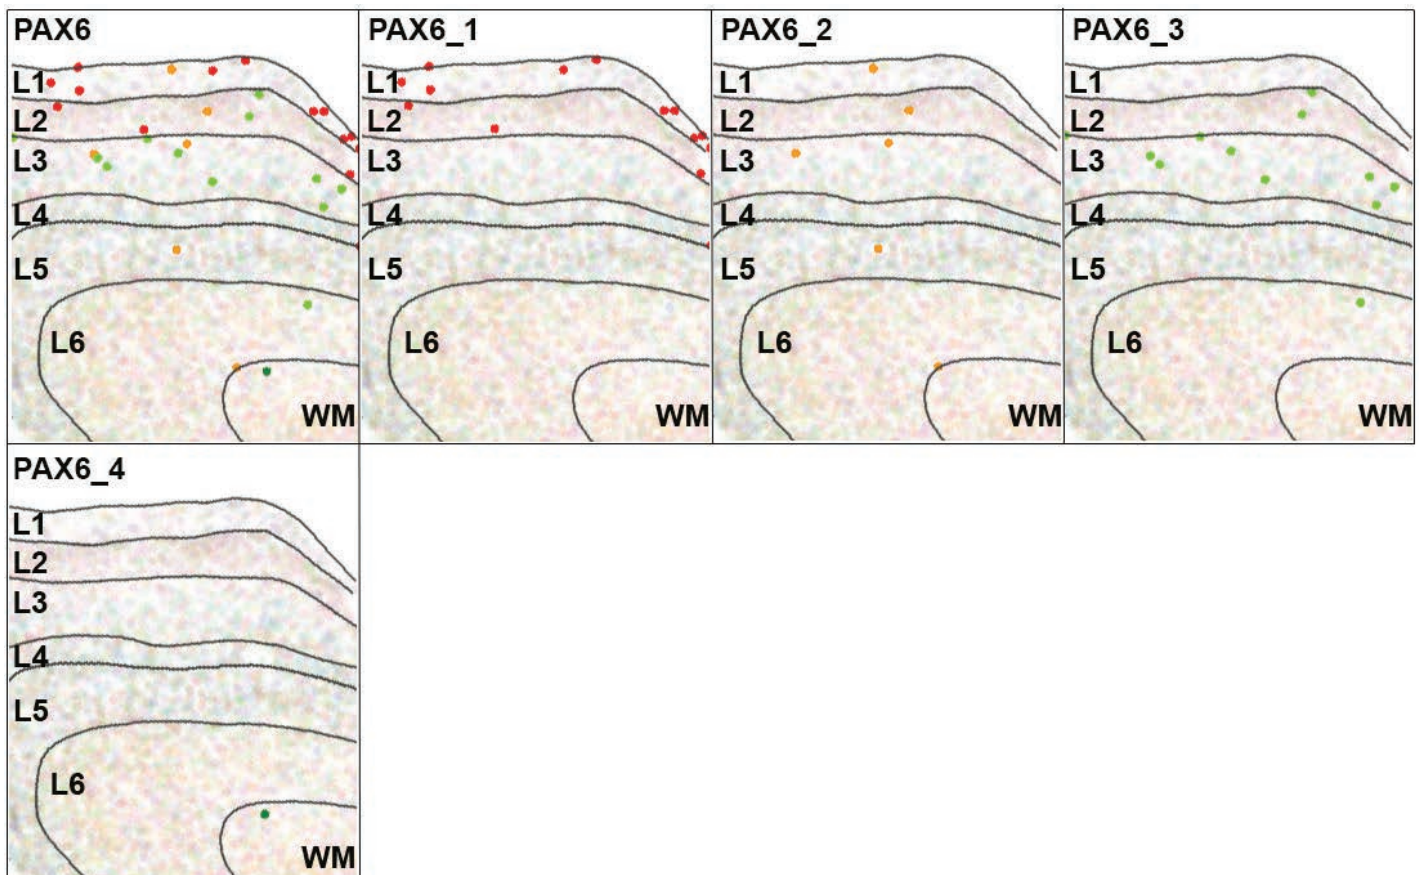

# VIP Interneurons 1

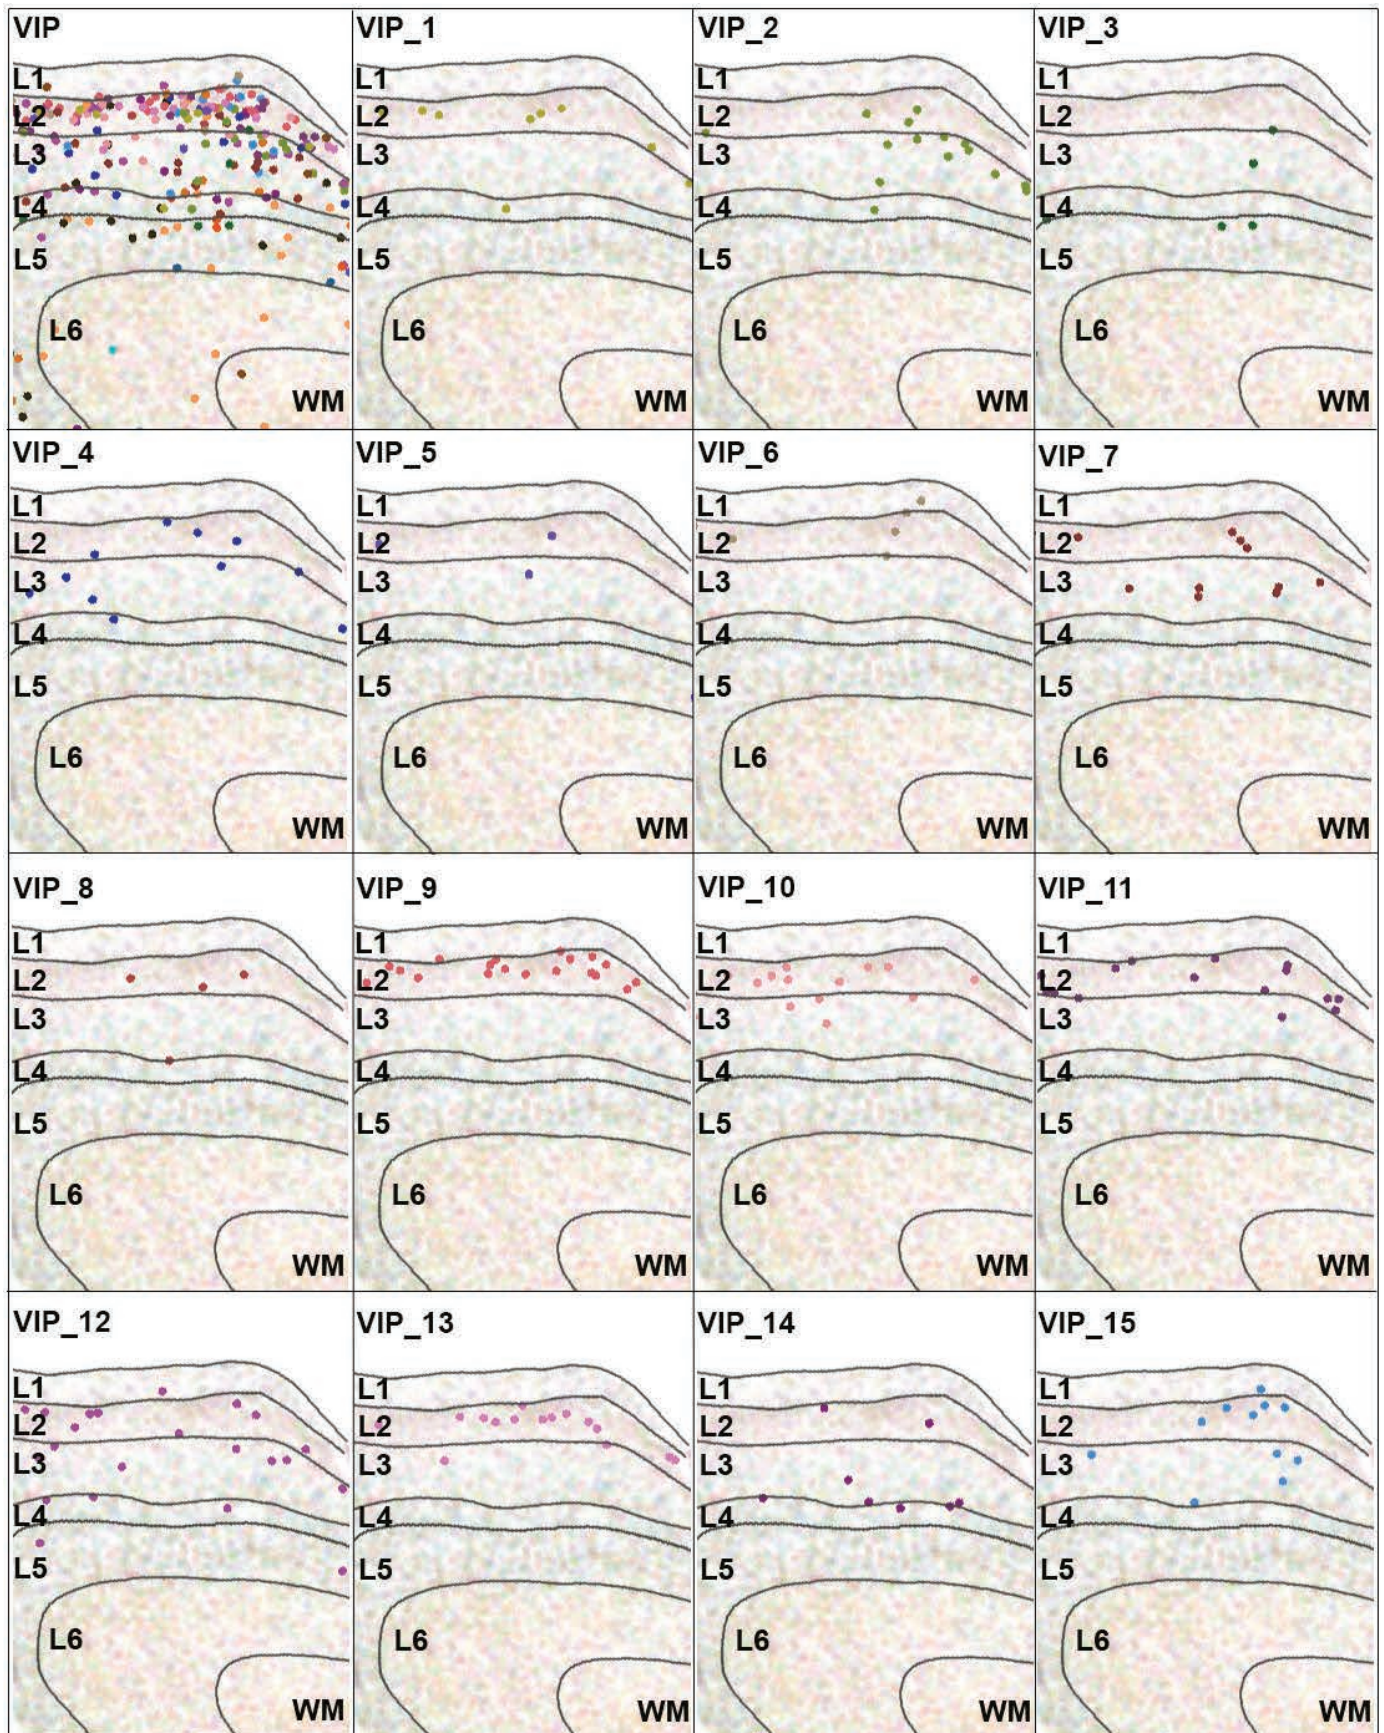

# VIP Interneurons 2

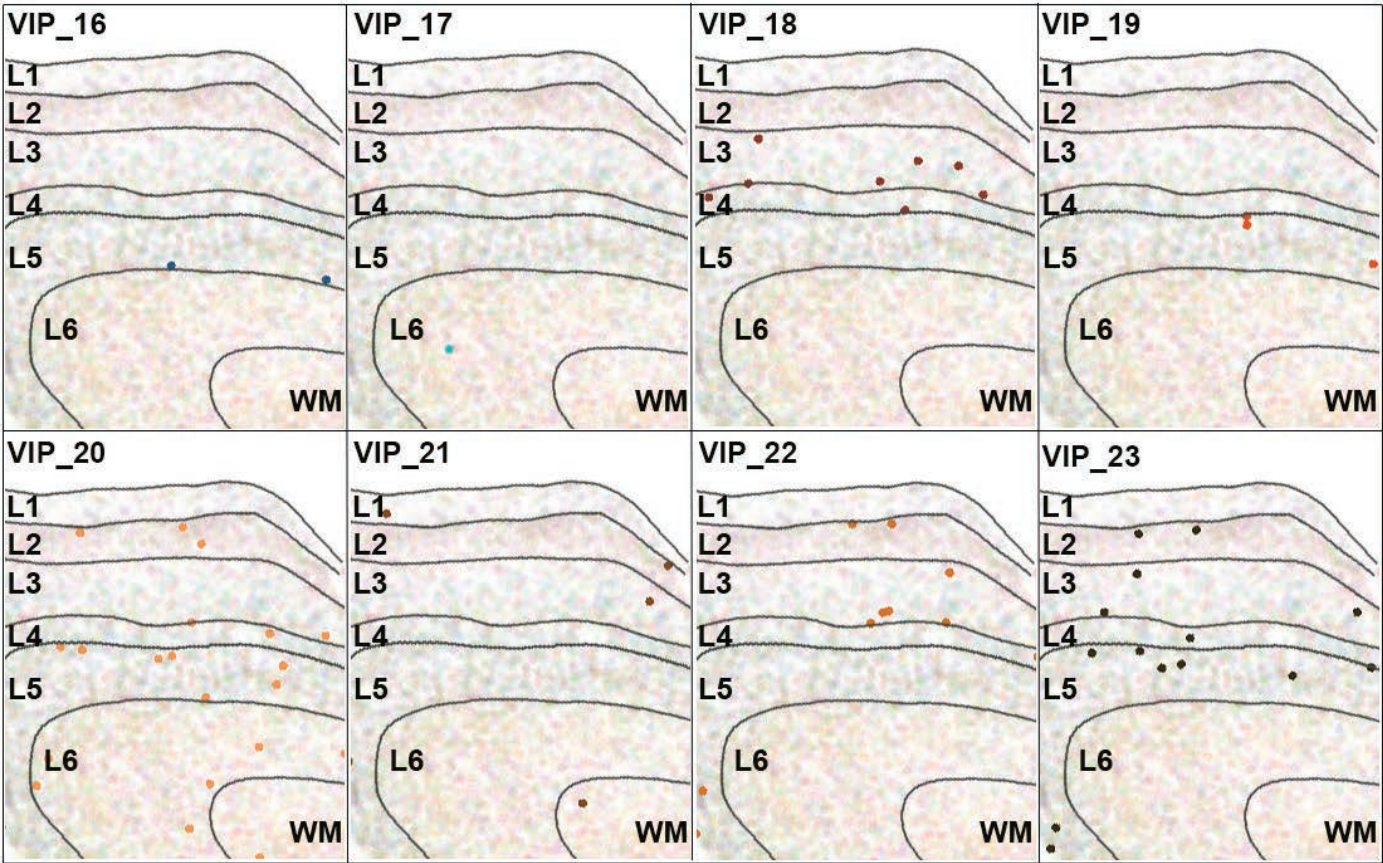



# SNCG Interneurons

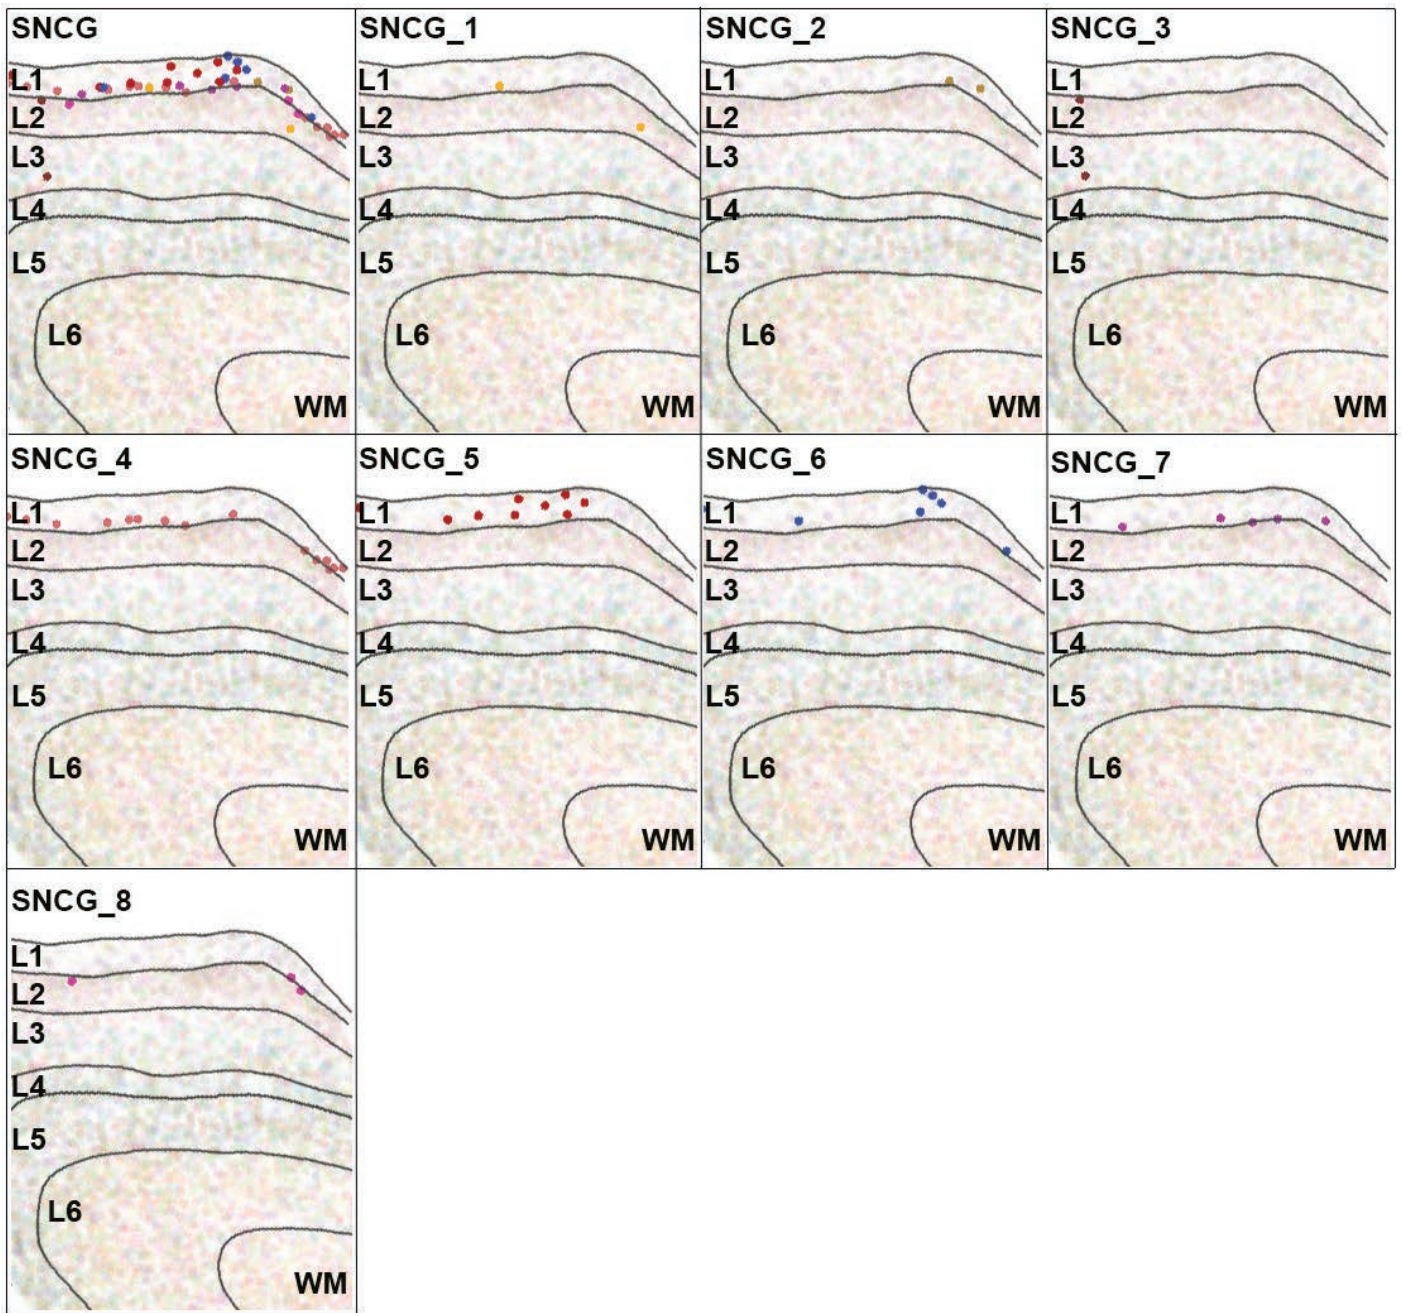

# Chandelier Interneurons

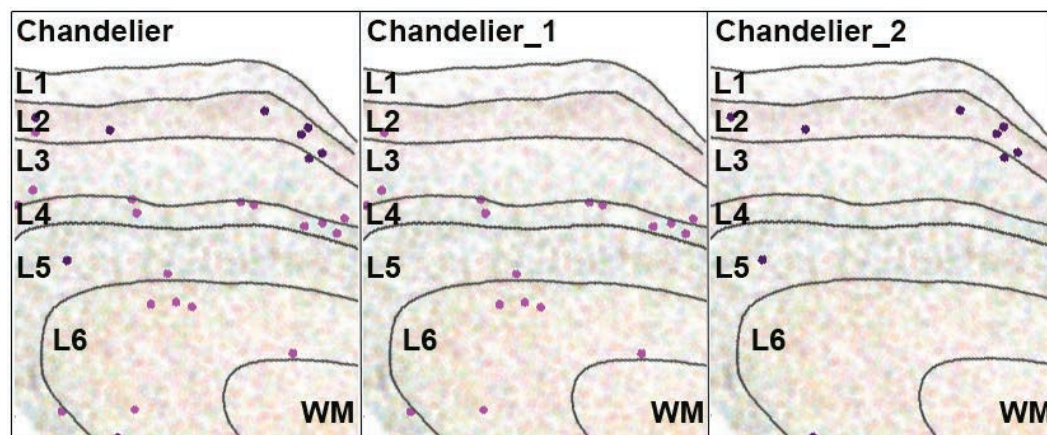

# PVALB Interneurons

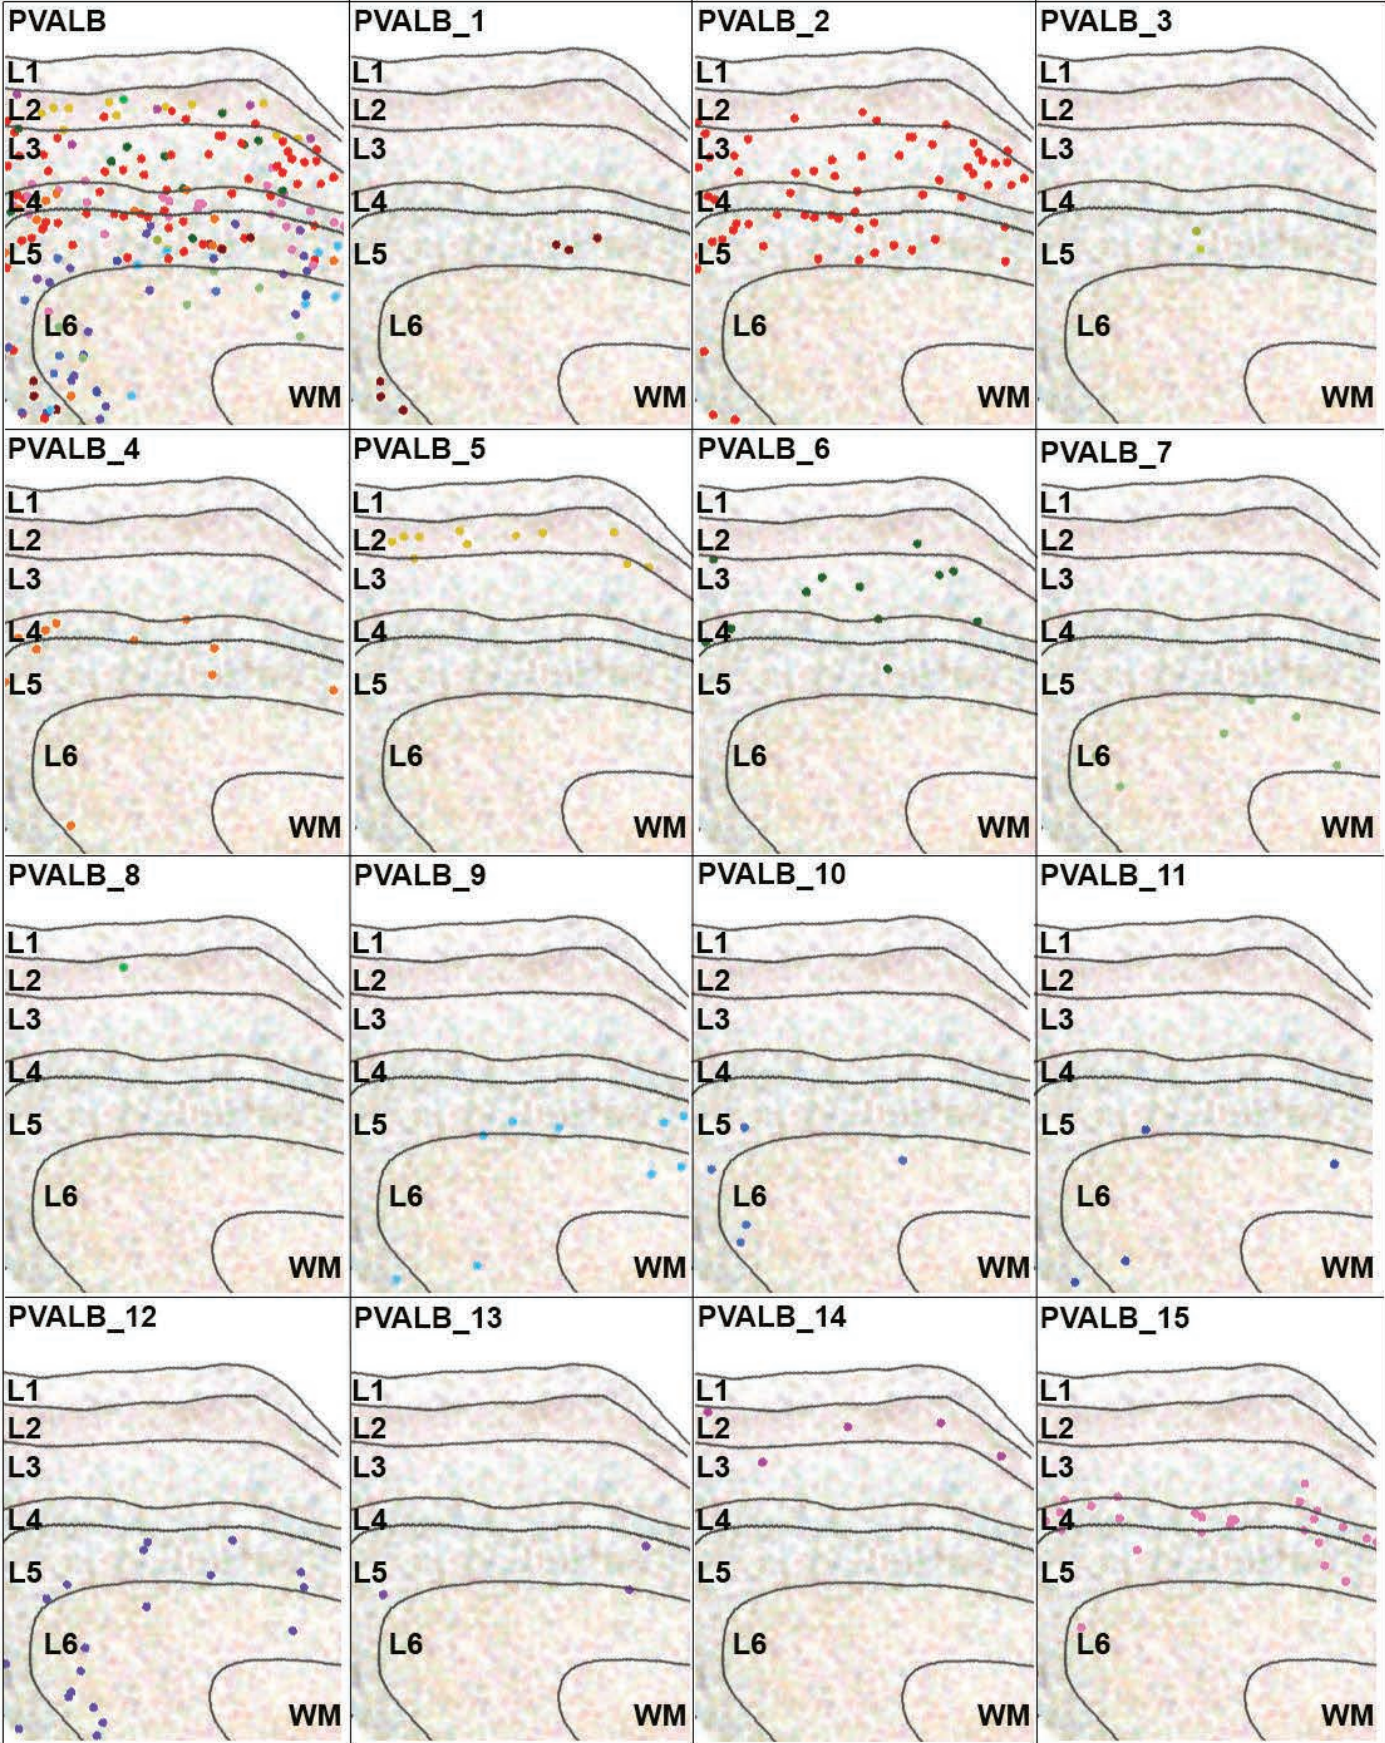

# SST Interneurons 1

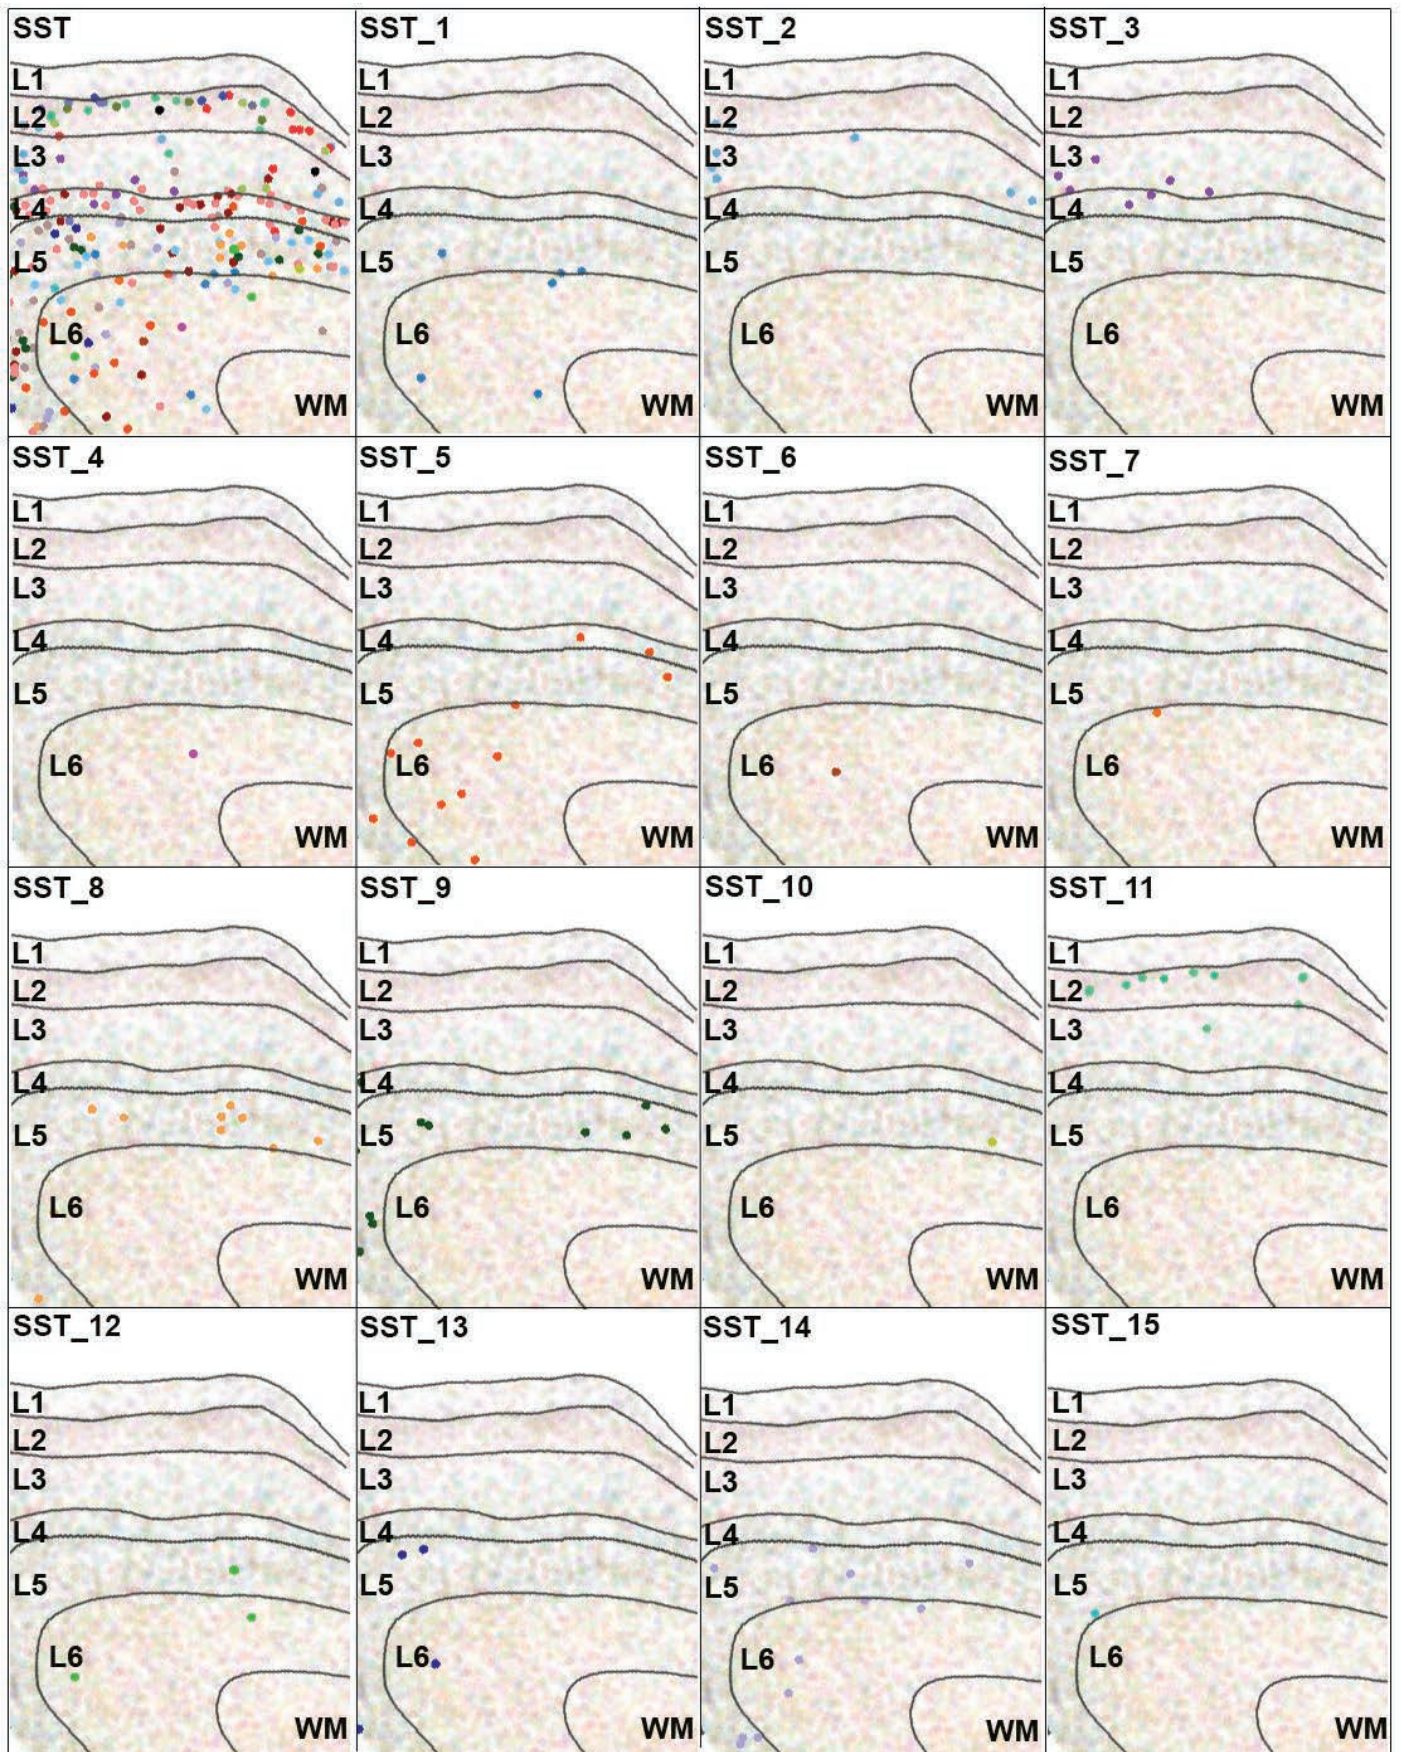

# SST Interneurons 2

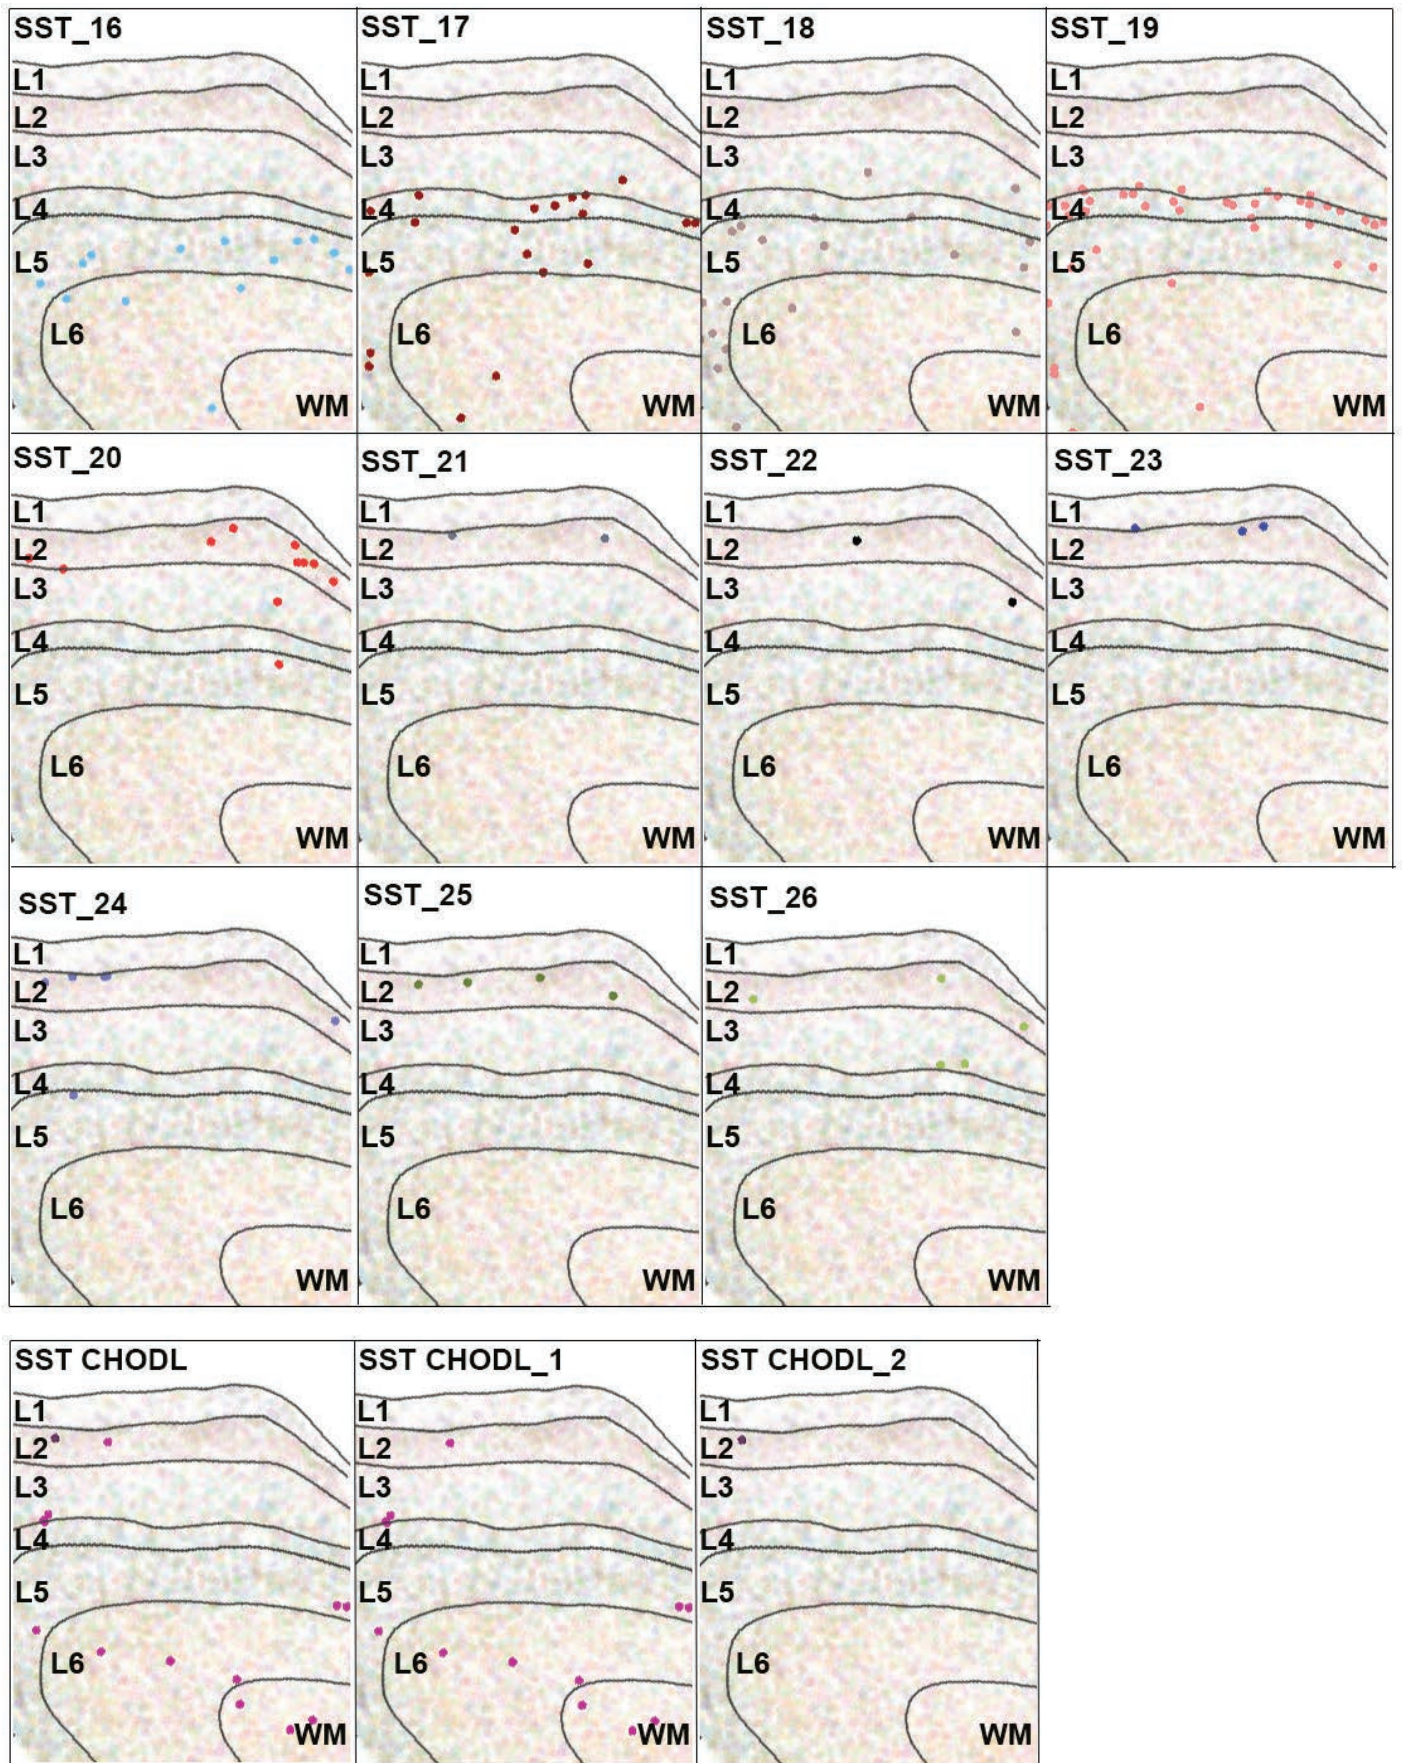

# Astrocytes

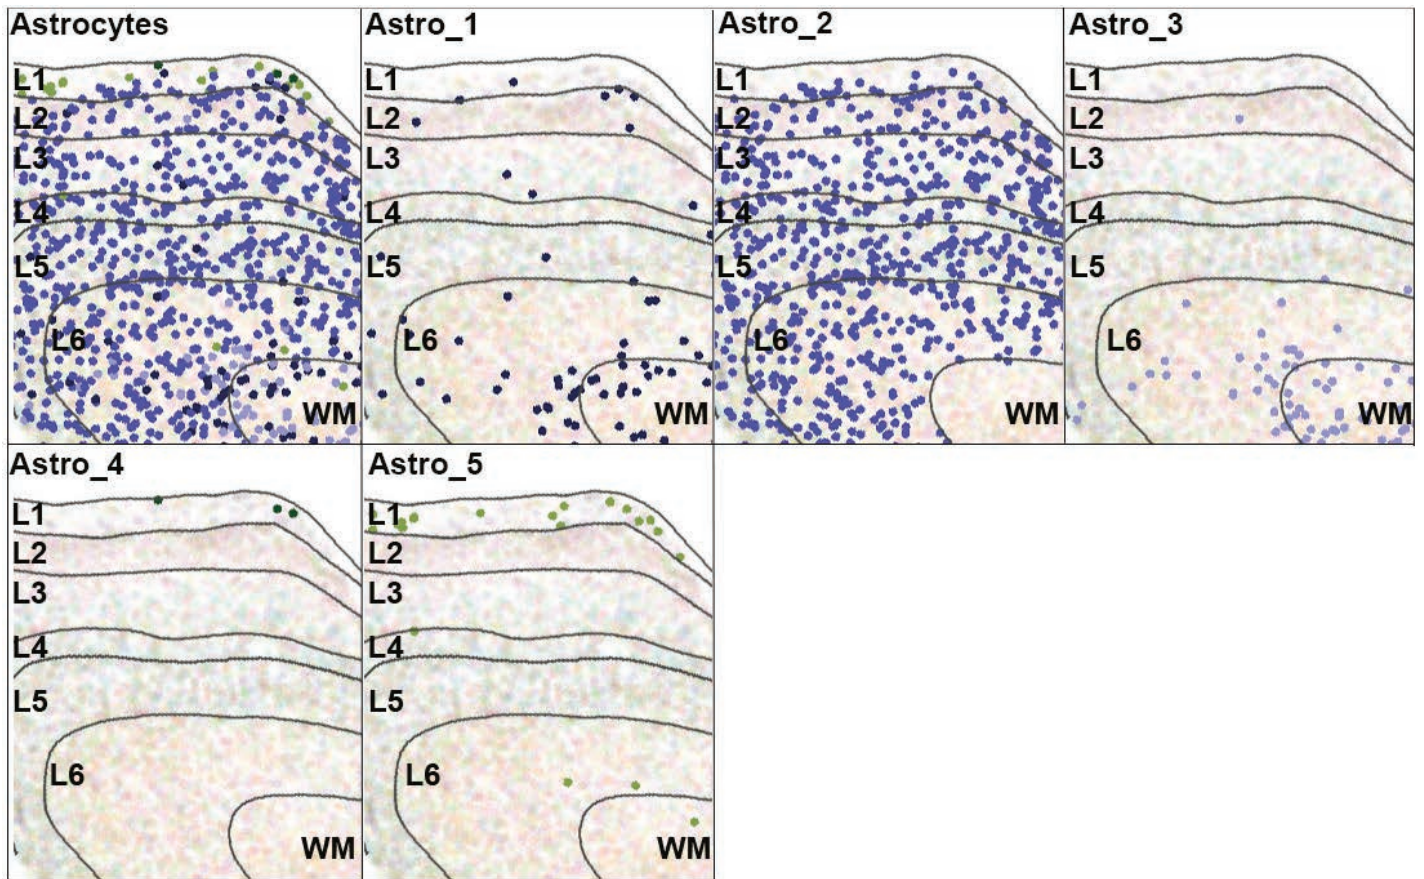

# Microglia

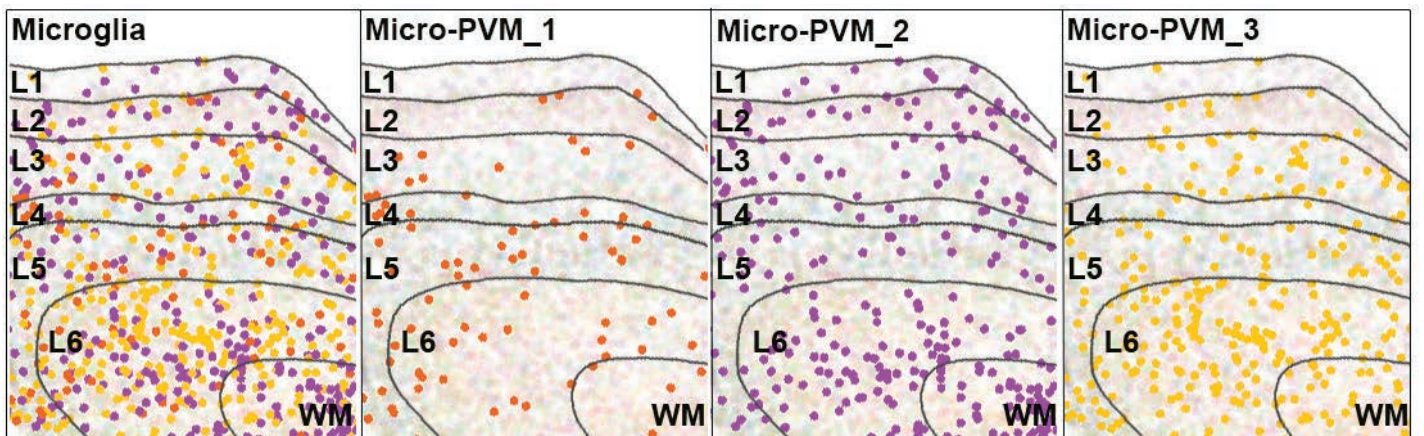

# Oligodendrocytes and OPCs

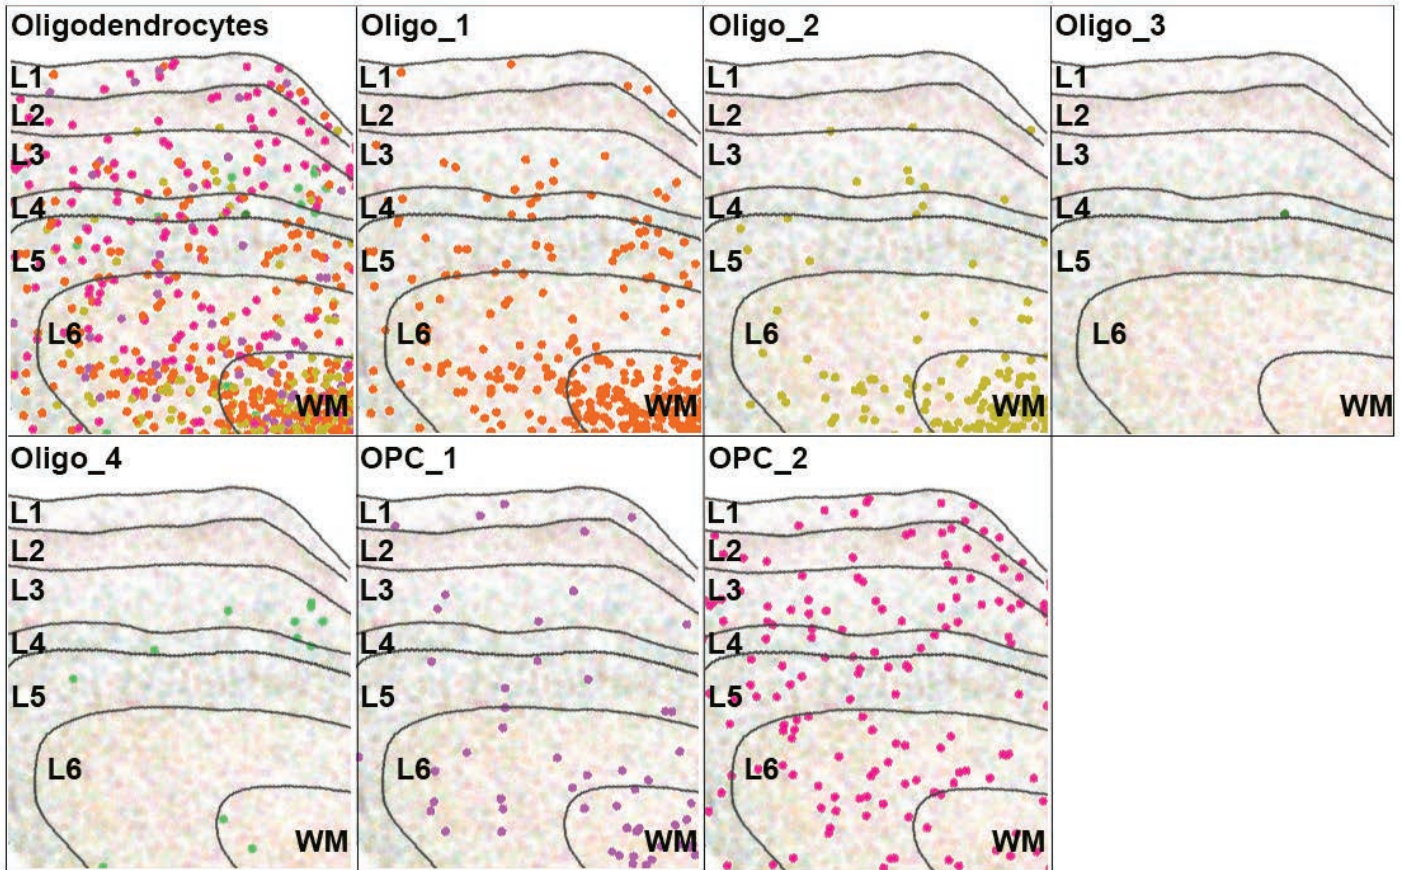

# VLMC

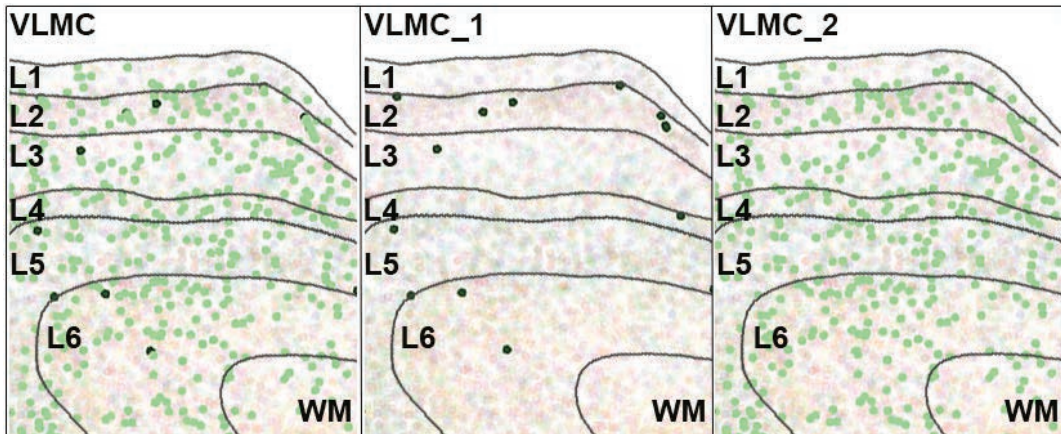

# Endothelial cells

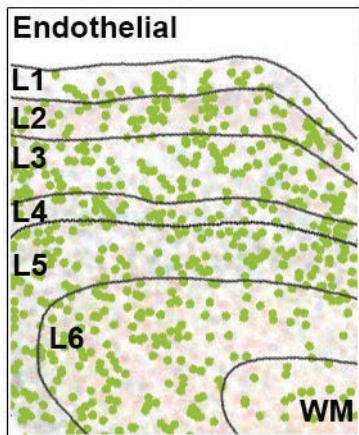

Supplement: NIHMS1941387-supplement-Supplementary_Media_1.pdf [file NIHMS1941387-supplement-Supplementary_Media_1.pdf]
